# Supplementary material
Source: publisher site journal article supplement (https://www.spandidos-publications.com/1912/downloadSupplementary)

Figure S1. Co-expression network of the differentially expressed long noncoding RNAs and mRNAs.

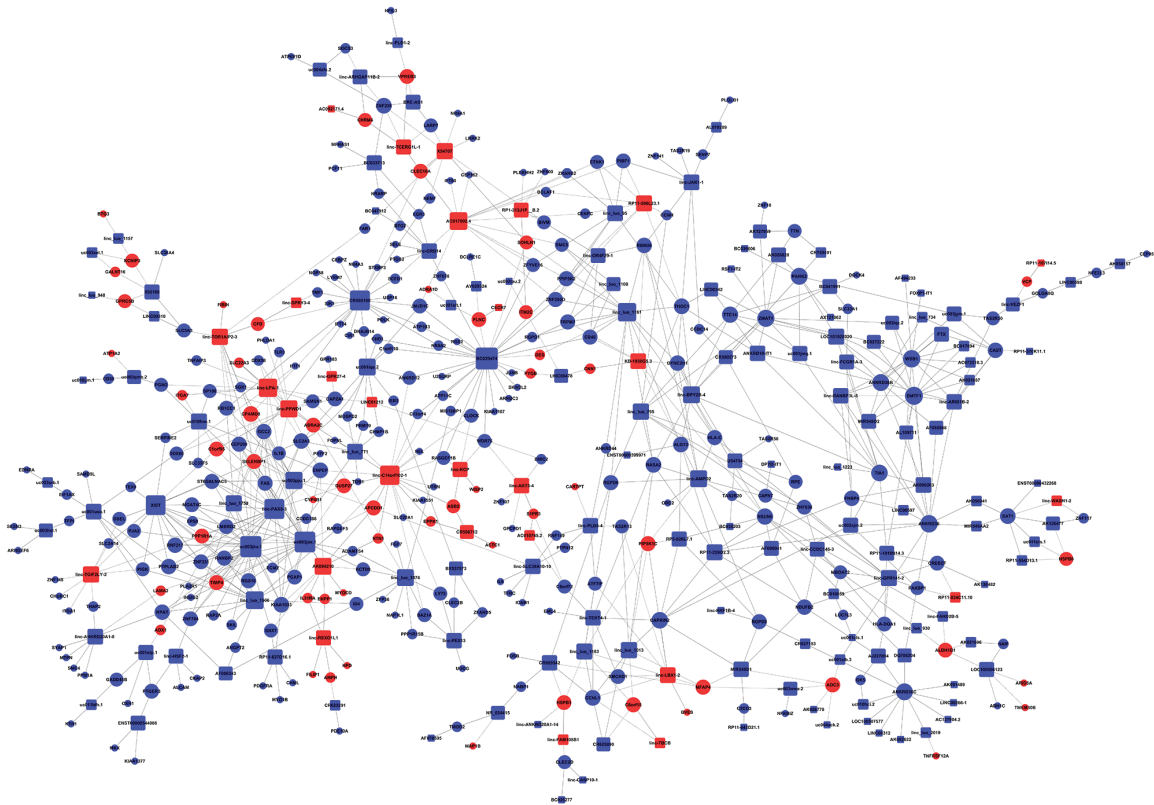

Supplement: Supplementary file 1 [file downloadSupplementary]
